# Supplementary material for: The effect of differential spatiotopic information on the acquisition and generalization of fear of movement-related pain
Source: PeerJ. 2019 May 15;7:e6913. doi: 10.7717/peerj.6913 (PMC6525585; doi:10.7717/peerj.6913)
Supplement: Supplemental Information 3 — The sheet “legend” includes the explanation of the variable names. [file peerj-07-6913-s003.xls]

## Sheet: data
Ppnr	Age	Sex M=0; V=1	Condition	Balancering	Shock intensity_start	Shock pijnlijk_start	Pain_US1	Pain_US2	Pain_US3	Pain_US4	Unpleasant_US1	Unpleasant_US2	Unpleasant_US3	Unpleasant_US4	FOP_CS+_B1	FOP_CS+_B2	FOP_CS+_B3	FOP_CS+_B4	FOP_CS+_B5	FOP_CS-_B1	FOP_CS-_B2	FOP_CS-_B3	FOP_CS-_B4	FOP_CS-_B5	unpleasant_CS+_B1	unpleasant_CS+_B2	unpleasant_CS+_B3	unpleasant_CS+_B4	unpleasant_CS+_B5	Unpleasant_CS-_B1	Unpleasant_CS-_B2	Unpleasant_CS-_B3	Unpleasant_CS-_B4	Unpleasant_CS-_B5	FOPonline_CS+_B1	FOPonline_CS+_B2	FOPonline_CS+_B3	FOPonline_CS+_B4	FOPonline_CS+_B5	FOPonline_CS+_B6	FOPonline_CS-_B1	FOPonline_CS-_B2	FOPonline_CS-_B3	FOPonline_CS-_B4	FOPonline_CS-_B5	FOPonline_CS-_B6	exp_CS+_B1	exp_CS+_B2	exp_CS+_B3
1	20	1	LOC	L	17	8	4	6	5	5	5	6	6	6	6	6	6	6	7	1	1	1	1	1	6	8	8	6	1	1	0	1	1	1	0	6	8	7	7	8	3	0	1	0	1	1	0	6	10
3	20	1	MOV	L	32	9	4	5	5	5	4	5	5	5	4	4	5	6	5	4	4	5	5	6	5	5	4	5	5	5	5	4	5	5	5	4	4	5	5	4	5	5	5	6	6	4	5	3	4
5	19	1	LOC	L	40	8.5	6	6	0	5	6	6	1	3	2	1	2	1	1	2	1	3	5	1	2	3	2	3	1	2	5	3	6	0	2	1	2	1	4	0	2	2	2	3	2	1	5	6	6
7	19	1	MOV	L	20	6	3	4	4	3	6	4	4	4	3	4	5	5	4	3	2	1	1	4	6	5	5	4	2	5	1	1	1	2	2	4	4	4	3	4	2	3	2	2	3	4	3	4	6
9	19	1	LOC	L	20	8	4	5	5	4	6	6	5	8	7	8	8	9	6	2	2	0	0	0	8	9	9	9	6	1	0	0	0	0	2	8	9	8	9	8	2	1	1	0	1	1	2	9	10
11	28	0	MOV	L	36	8	8	8	7	8	8	8	8	8	7	7	7	7	5	4	1	0	0	2	6	8	8	8	2	2	0	0	0	0	1	7	7	7	6	5	5	4	0	0	0	1	2	9	10
13	23	1	LOC	L	24	8	4	4	6	6	4	6	7	7	3	6	5	6	4	0	2	2	1	4	5	7	7	7	0	0	0	0	0	0	6	6	6	6	6	3	4	0	0	0	1	1	8	10	9
15	24	1	MOV	L	20	8	3	4	4	5	3	5	6	6	4	5	6	7	5	2	1	1	1	2	4	5	6	8	1	2	1	1	0	1	4	4	5	6	7	6	3	2	6	0	6	2	4	5	6
17	28	1	LOC	L	24	8	6	7	6	7	8	8	8	9	7	2	7	2	7	7	7	3	7	7	3	2	8	2	1	7	8	2	9	1	7	7	7	8	7	3	3	3	2	5	6	8	7	8	5
19	51	0	MOV	L	32	8	0	0	0	0	2	2	0	2	0	0	0	0	0	0	0	0	0	0	0	0	0	0	0	0	0	0	0	0	0	0	0	0	0	0	0	0	0	0	0	0	0	0	0
21	49	1	LOC	L	24	8	7	5	5	5	6	5	5	5	4	7	7	7	2	4	7	2	2	2	6	6	7	8	2	6	4	2	2	2	3	5	5	7	7	2	4	6	3	3	3	3	4	7	6
23	29	0	MOV	L	14	8	7	8	9	9	8	8	9	9	7	8	8	7	7	1	3	0	1	8	8	8	8	9	1	0	0	1	0	1	3	1	8	8	8	8	3	6	6	6	2	1	7	1	8
25	22	1	LOC	L	44	7.5	7	7	8	8	8	8	8	8	6	7	7	7	6	1	1	1	1	0	6	7	7	8	7	2	1	1	0	0	6	5	7	7	7	7	1	1	1	1	1	0	9	6	9
27	22	1	MOV	L	20	8	6	7	8	9	8	8	8	9	8	8	8	9	6	1	0	1	2	4	8	8	8	2	6	1	0	1	2	4	8	9	9	8	9	5	3	1	1	1	2	4	7	9	9
29	23	1	LOC	L	28	8	7	6	7	8	8	9	9	8	2	3	3	2	1	0	0	0	0	0	8	9	9	9	1	0	0	0	0	0	2	3	3	3	3	0	0	0	0	0	0	0	9	10	10
31	24	1	MOV	L	14	7	8	8	8	7	8	9	9	7	8	8	6	8	1	7	8	6	3	1	7	9	8	8	1	7	9	6	1	1	0	9	9	8	8	7	6	9	9	8	8	5	0	10	8
33	24	0	LOC	L	96	7.5	7	7	8	8	6	7	8	8	6	7	7	8	7	6	1	0	0	0	6	7	8	8	2	6	1	0	0	0	2	4	8	8	8	6	4	4	1	0	0	0	4	5	8
35	23	0	MOV	L	11	6	1	2	1	0	1	2	0	0	1	4	1	0	0	1	0	1	4	6	1	4	1	0	0	1	0	2	6	6	4	3	2	0	0	0	2	2	0	0	5	2	5	7	9
37	22	1	LOC	L	48	6	5	7	7	8	7	7	8	8	2	2	3	3	4	0	0	0	0	5	6	7	8	8	2	0	0	0	0	2	2	2	2	3	3	3	1	1	0	1	4	3	6	7	8
39	23	0	MOV	L	11	8	3	4	5	6	3	4	5	6	3	4	4	5	4	1	0	0	0	3	4	5	5	5	4	1	0	0	0	1	3	3	4	5	5	4	3	0	0	0	0	4	4	5	9
41	22	1	LOC	L	11	8	6	6	6	7	7	7	9	9	3	5	5	5	3	0	0	0	5	1	6	6	8	9	2	0	0	0	0	1	3	4	5	5	5	4	0	1	0	2	1	1	7	7	7
43	20	0	MOV	L	11	7.5	7	6	5	7	7	7	6	7	7	4	7	6	1	3	4	2	0	1	7	7	7	8	1	7	7	2	0	1	3	3	3	2	6	2	2	6	3	4	2	3	7	6	6
45	22	1	LOC	L	14	6	3	5	5	5	3	5	6	6	3	5	5	4	4	0	0	0	0	4	3	6	5	6	0	0	0	0	0	3	2	6	6	4	5	3	2	0	0	0	6	6	6	10	9
47	23	0	MOV	L	14	8	4	10	10	8	4	10	10	8	4	9	9	10	9	4	8	0	0	0	4	8	9	9	0	7	0	0	0	0	0	9	9	9	9	7	0	8	0	0	0	0	7	9	9
49	23	1	LOC	L	28	8	8	7	7	8	8	7	7	8	2	9	7	7	0	2	0	0	7	0	2	8	8	5	0	5	0	0	2	0	6	10	9	7	10	0	5	0	0	0	5	0	10	9	10
51	26	0	MOV	L	17	5	2	2	3	3	2	2	3	3	0	0	0	0	0	0	0	0	0	0	0	0	0	0	0	0	0	0	0	0	0	0	0	0	0	0	0	0	0	0	0	0	2	3	4
2	19	1	LOC	R	32	8	4	3	4	3	3	4	4	3	3	3	3	2	3	2	3	2	4	4	2	4	4	3	0	2	4	0	1	0	3	3	3	2	4	3	3	3	3	2	4	4	4	3	4
4	20	1	MOV	R	48	8	7	4	3	1	7	4	3	1	5	4	2	2	1	5	2	2	2	1	6	6	3	2	1	6	1	2	1	1	6	5	3	2	2	2	5	2	4	2	2	4	7	7	8
6	24	1	LOC	R	11	7	7	7	7	7	7	8	8	8	7	8	8	8	7	3	1	2	1	3	8	8	8	8	0	2	0	0	0	0	6	7	8	8	8	8	6	1	2	2	2	3	7	10	9
8	23	1	MOV	R	20	8	7	7	6	6	7	7	7	6	2	2	3	4	1	1	0	0	1	0	3	7	6	8	0	0	0	3	1	0	1	2	2	3	3	2	1	0	0	1	1	0	6	7	10
10	26	1	LOC	R	17	8	6	7	7	8	8	8	9	9	4	5	5	7	7	0	0	0	0	0	8	8	8	9	2	0	0	0	0	0	2	4	5	6	7	7	0	0	0	0	0	0	2	9	10
12	24	0	MOV	R	17	9	7	8	8	7	7	8	8	7	7	7	8	7	7	7	7	6	4	2	6	6	8	8	7	6	6	6	4	3	6	8	8	8	8	7	6	8	7	6	3	3	5	8	7
14	22	0	LOC	R	36	8	6	7	7	5	7	7	7	5	3	3	4	3	2	0	0	0	0	2	6	7	7	6	0	0	0	0	0	0	1	4	4	4	3	2	0	0	0	0	3	0	6	8	8
16	26	1	MOV	R	44	7	6	6	6	7	6	7	7	8	5	6	4	4	5	5	5	2	2	2	3	4	4	5	5	3	3	2	2	2	5	6	6	6	7	7	5	7	6	6	7	7	5	7	7
18	55	0	LOC	R	20	8	6	3	3	2	3	3	2	2	3	2	3	2	3	3	3	3	2	3	3	2	3	2	3	3	2	3	3	3	3	3	2	3	3	2	4	3	2	3	3	2	4	4	2
20	55	1	MOV	R	11	6	5	5	6	5	4	5	5	5	2	1	7	0	0	2	0	0	0	0	1	6	6	0	0	1	1	7	0	0	1	5	7	7	3	0	3	0	0	1	1	1	5	7	7
22	23	1	LOC	R	11	8	3	2	4	0	4	5	5	6	0	6	5	5	0	0	0	0	0	0	4	6	6	6	0	4	0	0	0	0	0	2	1	0	0	0	0	0	0	0	0	0	6	8	9
24	19	1	MOV	R	8	6	4	3	2	2	3	2	2	2	1	2	1	1	2	1	2	1	1	2	1	1	1	2	1	1	1	1	2	1	5	3	2	1	2	1	4	2	1	2	2	1	4	1	1
26	24	1	LOC	R	40	8	6	7	8	8	7	7	7	8	5	6	7	6	5	1	0	0	6	0	7	7	6	7	0	1	0	1	0	0	2	5	6	7	7	5	3	0	0	0	1	1	3	9	9
28	25	0	MOV	R	14	8	8	8	7	8	8	8	9	8	1	1	0	1	0	0	1	0	0	0	8	8	9	8	0	8	8	9	0	0	1	0	1	0	0	0	1	0	1	0	0	0	8	8	7
30	22	1	LOC	R	14	9	5	5	6	6	5	5	6	6	3	8	10	10	0	3	3	0	0	0	5	8	10	10	0	5	2	0	1	0	2	8	10	10	10	0	3	2	0	0	0	0	2	8	10
32	22	1	MOV	R	14	7.5	5	6	7	7	6	6	7	7	6	8	6	8	5	4	2	0	0	5	5	7	6	8	0	4	0	0	0	0	6	6	6	6	7	6	5	3	0	0	0	7	6	7	9
34	21	1	LOC	R	8	6	5	9	9	7	5	10	9	7	3	7	10	7	7	3	7	7	7	7	3	9	10	8	5	3	5	7	5	3	4	7	10	8	10	10	5	4	8	7	8	9	2	8	10
36	27	0	MOV	R	11	8	5	6	6	6	6	6	6	6	2	2	2	2	1	2	2	2	2	1	2	2	2	2	1	2	2	2	3	1	2	2	2	2	2	2	2	2	2	2	2	1	8	9	9
38	23	1	LOC	R	14	7	6	7	7	7	6	5	7	7	4	7	7	7	7	5	4	4	2	3	5	7	8	8	5	4	4	3	1	1	4	6	6	7	6	5	5	6	3	1	4	4	5	6	9
40	19	0	MOV	R	36	7	6	7	0	8	8	8	0	10	3	6	0	7	7	3	5	0	7	9	6	7	1	7	1	6	5	0	3	1	2	6	0	7	6	8	2	2	2	6	7	6	5	9	7
42	20	0	LOC	R	88	8	3	5	4	6	6	5	6	7	4	6	5	6	6	4	1	0	0	2	5	6	6	6	7	5	0	0	0	0	1	2	2	2	2	6	1	2	0	0	2	1	5	6	9
44	22	1	MOV	R	20	8	7	8	8	8	8	9	9	9	3	4	5	6	1	0	0	0	0	0	7	7	7	8	2	0	0	0	0	0	2	4	4	5	1	0	0	0	0	0	0	0	8	10	9
46	22	1	LOC	R	14	6	5	7	6	6	7	7	7	8	7	6	6	6	7	1	0	0	0	2	8	7	7	8	0	0	0	0	0	0	3	6	6	6	6	6	3	0	0	0	7	3	8	10	9
48	33	0	MOV	R	36	8	5	3	2	3	3	2	2	1	1	0	0	1	0	0	0	0	1	0	1	0	0	0	0	1	0	0	0	0	0	1	0	0	1	0	0	1	0	1	1	0	4	7	5
50	26	1	LOC	R	11	6	3	4	4	4	4	4	4	4	3	1	4	2	4	5	4	5	5	4	2	5	2	2	3	4	5	6	5	5	3	5	6	5	6	4	3	3	1	2	2	4	2	7	8
[truncated: 17 more columns]

## Sheet: legend
Variable name	Explanation
Ppnr	Participant Number
Age	Age
Sex M=0; V=1	Sex: 1= female; 0= male
Condition	LOC=location group; MOV=movement group
Balancering	L= left movement CS+; R = right movement CS+
Shock intensity_start	intensity calibration painful stimulus (in miliamperes)
Shock pijnlijk_start	intensity calibration painful stimulus (rating scale from 0-10)
Pain_US1	Acquisition Block 1 retrospective pain expectancy
Pain_US2	Acquisition Block 2 retrospective pain expectancy
Pain_US3	Acquisition Block 3 retrospective pain expectancy
Pain_US4	Acquisition Block 4 retrospective pain expectancy
Unpleasant_US1	Acquisition Block 1 retrospective pain unpleasantness
Unpleasant_US2	Acquisition Block 2 retrospective pain unpleasantness
Unpleasant_US3	Acquisition Block 3 retrospective pain unpleasantness
Unpleasant_US4	Acquisition Block 4 retrospective pain unpleasantness
FOP_CS+_B1	Fear of pain for the CS+ first aquisition block
FOP_CS+_B2	Fear of pain for the CS+ second aquisition block
FOP_CS+_B3	Fear of pain for the CS+ third aquisition block
FOP_CS+_B4	Fear of pain for the CS+ fourth aquisition block
FOP_CS+_B5	Fear of pain for the GS+ generalization block
FOP_CS-_B1	Fear of pain for the CS- first aquisition block
FOP_CS-_B2	Fear of pain for the CS- second aquisition block
FOP_CS-_B3	Fear of pain for the CS- third aquisition block
FOP_CS-_B4	Fear of pain for the CS- fourth aquisition block
FOP_CS-_B5	Fear of pain for the GS- generalization block
unpleasant_CS+_B1	Unpleasantness of the CS+ first aquisition block
unpleasant_CS+_B2	Unpleasantness of the CS+ second aquisition block
unpleasant_CS+_B3	Unpleasantness of the CS+ third aquisition block
unpleasant_CS+_B4	Unpleasantness of the CS+ fourth aquisition block
unpleasant_CS+_B5	Unpleasantness of the GS+ generalization block
Unpleasant_CS-_B1	Unpleasantness of the CS- first aquisition block
Unpleasant_CS-_B2	Unpleasantness of the CS- second aquisition block
Unpleasant_CS-_B3	Unpleasantness of the CS- third aquisition block
Unpleasant_CS-_B4	Unpleasantness of the CS- fourth aquisition block
Unpleasant_CS-_B5	Unpleasantness of the GS- generalization block
FOPonline_CS+_B1	Prospective fear of pain of the CS+ during the first acquisition block
FOPonline_CS+_B2	Prospective fear of pain of the CS+ during the second acquisition block
FOPonline_CS+_B3	Prospective fear of pain of the CS+ during the third acquisition block
FOPonline_CS+_B4	Prospective fear of pain of the CS+ during the fourth acquisition block
FOPonline_CS+_B5	Prospective fear of pain of the CS+ during the first trial of the generalization block
FOPonline_CS+_B6	Prospective fear of pain of the CS+ during the second part of the generalization block
FOPonline_CS-_B1	Prospective fear of pain of the CS- during the first acquisition block
FOPonline_CS-_B2	Prospective fear of pain of the CS- during the second acquisition block
FOPonline_CS-_B3	Prospective fear of pain of the CS- during the third acquisition block
FOPonline_CS-_B4	Prospective fear of pain of the CS- during the fourth acquisition block
FOPonline_CS-_B5	Prospective fear of pain of the CS- during the first trial of the generalization block
FOPonline_CS-_B6	Prospective fear of pain of the CS- during the second part of the generalization block
exp_CS+_B1	Prospective pain-US expectancy of the CS+ during the first acquisition block
exp_CS+_B2	Prospective pain-US expectancy of the CS+ during the second acquisition block
exp_CS+_B3	Prospective pain-US expectancy of the CS+ during the third acquisition block
exp_CS+_B4	Prospective pain-US expectancy of the CS+ during the fourth acquisition block
exp_CS+_B5	Prospective pain-US expectancy of the CS+ during the first trial of the generalization block
exp_CS+_B6	Prospective pain-US expectancy of the CS+ during the second part of the generalization block
exp_CS-_B1	Prospective pain-US expectancy of the CS- during the first acquisition block
exp_CS-_B2	Prospective pain-US expectancy of the CS- during the second acquisition block
exp_CS-_B3	Prospective pain-US expectancy of the CS- during the third acquisition block
exp_CS-_B4	Prospective pain-US expectancy of the CS- during the fourth acquisition block
exp_CS-_B5	Prospective pain-US expectancy of the CS- during the first trial of the generalization block
exp_CS-_B6	Prospective pain-US expectancy of the CS- during the second part of the generalization block
